# Supplementary material for: Taking the Operant Paradigm into the Field: Associative Learning in Wild Great Tits
Source: PubMed Central journal article supplement (PMC4546055; doi:10.1371/journal.pone.0133821), 2015-08-19
Supplement: pone.0133821.s002.pdf [file pone.0133821.s002.pdf]

## Supplementary Tables

Table A. Total number of visits to the devices (“N”), total number of trials (“N”), along with range (minimum-maximum), median and mean  $\pm$  standard error (s.e.) for total number of trials per individual, for each of the four species.

| Species    | Visits<br><i>N</i> | Trials<br><i>N</i> | Number of trials per individual |        |                 |
|------------|--------------------|--------------------|---------------------------------|--------|-----------------|
|            |                    |                    | Range                           | Median | Mean $\pm$ s.e. |
| Great tits | 7159               | 5086               | 1-700                           | 6      | 75.9 $\pm$ 19.4 |
| Blue tits  | 237                | 32                 | 1-13                            | 1      | 4.0 $\pm$ 1.7   |
| Marsh tits | 78                 | 9                  | 1-6                             | 1      | 2.3 $\pm$ 1.4   |
| Coal tits  | 6                  | 1                  | 1-1                             | 1      | 1.0 $\pm$ 0.0   |

Table B. Results of a binomial GLMM for correct (red) vs. incorrect (green, yellow) choices over successive trials, including a random intercept for individual identity and a random slope for identity over scaled trial number (n = 3465 trials by 21 individuals). This model examines differences in learning slopes over trials in successful problem-solvers vs. non-solvers.

| <i>Fixed term</i>          | $X^2$ | <i>d.f.</i> | <i>p</i> |
|----------------------------|-------|-------------|----------|
| Site in Wytham             | 1.110 | 3           | 0.777    |
| Inter-trial interval (log) | 2.592 | 1           | 0.107    |
| Sex                        | 2.245 | 1           | 0.134    |
| Age                        | 0.587 | 1           | 0.444    |
| Exploration                | 7.632 | 1           | 0.006    |
| Problem-solving * Trial    | 5.329 | 1           | 0.021    |

Table C. Results of a binomial GLMM for correct (red) vs. incorrect (green, yellow) choices over successive trials, including a random intercept for individual identity and a random slope for identity over scaled trial number (n = 3465 trials by 21 individuals). This model examines differences in learning slopes over trials in adults versus juveniles.

| <i>Fixed term</i>          | $X^2$ | <i>d.f.</i> | <i>p</i> |
|----------------------------|-------|-------------|----------|
| Site in Wytham             | 1.418 | 3           | 0.701    |
| Inter-trial interval (log) | 3.514 | 1           | 0.061    |
| Sex                        | 3.261 | 1           | 0.071    |
| Exploration                | 7.623 | 1           | 0.006    |
| Problem-solving            | 0.266 | 1           | 0.606    |
| Age * Trial                | 0.036 | 1           | 0.006    |

Table D. Results of a binomial GLMM for correct (red) vs. incorrect (green, yellow) choices over successive trials, including a random intercept for individual identity and a random slope for identity over scaled trial number (n = 3465 trials by 21 individuals). This model examines differences in learning slopes over trials in females vs. males.

| <i>Fixed term</i>          | $X^2$ | <i>d.f.</i> | <i>p</i> |
|----------------------------|-------|-------------|----------|
| Site in Wytham             | 1.172 | 3           | 0.760    |
| Inter-trial interval (log) | 3.293 | 1           | 0.070    |
| Age                        | 0.590 | 1           | 0.442    |
| Exploration                | 6.308 | 1           | 0.012    |
| Problem-solving            | 0.010 | 1           | 0.919    |
| Sex * Trial                | 0.363 | 1           | 0.547    |

Table E. Results of a binomial GLMM for correct (red) vs. incorrect (green, yellow) choices over successive trials, including a random intercept for individual identity and a random slope for identity over scaled trial number (n = 3465 trials by 21 individuals). This model examines differences in learning slopes over trials in relation to exploration score.

| <i>Fixed term</i>          | $X^2$ | <i>d.f.</i> | <i>p</i> |
|----------------------------|-------|-------------|----------|
| Site in Wytham             | 0.802 | 3           | 0.849    |
| Inter-trial interval (log) | 3.465 | 1           | 0.063    |
| Sex                        | 2.264 | 1           | 0.132    |
| Age                        | 1.757 | 1           | 0.185    |
| Problem-solving            | 0.321 | 1           | 0.571    |
| Exploration * Trial        | 0.965 | 1           | 0.326    |
